# Supplementary material for: The Benefit Finding Questionnaire (BFQ): Scale Development, Validation, and Its Psychometric Properties Among People with Mental Illness
Source: MDPI journal article supplement (doi:10.3390/healthcare8030303), 2020-08-26
Supplement: s1 [file s1]

## Appendix A. Benefit Finding Questionnaire (BFQ) (English)

Many people who have suffered an illness experience various changes. They may experience difficulties or feel that they have lost something. While coping with these changes, they may also feel that they have gained or learnt something. Compared with when you began suffering from (mental) illness, how do you think you have changed with respect to the following aspects?

Please circle the answer you feel is the most appropriate on a scale of 1–5.

|    |                                                                                                                                                                                                                                                         |
|----|---------------------------------------------------------------------------------------------------------------------------------------------------------------------------------------------------------------------------------------------------------|
| 1  | Your ties (relationships) with your family have been<br>1 _____ 2 _____ 3 _____ 4 _____ 5<br>weakened            relatively weakened            neither            relatively strengthened            strengthened                                      |
| 2  | Your ties (relationships) with your friends and peers have been<br>1 _____ 2 _____ 3 _____ 4 _____ 5<br>weakened            relatively weakened            neither            relatively strengthened            strengthened                           |
| 3  | Trustworthy friends or peers you would not have met if you did not have (mental) illness have been gained<br>1 _____ 2 _____ 3 _____ 4 _____ 5<br>none            little            somewhat            quite a lot            a lot                    |
| 4  | The peace of mind that you can get help from healthcare/ welfare staff and volunteers during difficult times has been gained<br>1 _____ 2 _____ 3 _____ 4 _____ 5<br>none            little            somewhat            quite a lot            a lot |
| 5  | The opportunities to greet and speak to neighbors and people in the community have been<br>1 _____ 2 _____ 3 _____ 4 _____ 5<br>decreased            relatively decreased            neither            relatively increased            increased       |
| 6  | Your compassion and empathy for people have been<br>1 _____ 2 _____ 3 _____ 4 _____ 5<br>weakened            relatively weakened            neither            relatively strengthened            strengthened                                          |
| 7  | A sense that you got to be able to tell your feelings to those around you has been gained<br>1 _____ 2 _____ 3 _____ 4 _____ 5<br>none            little            somewhat            quite a lot            a lot                                    |
| 8  | A sense that you are not the only one having a tough time has been gained<br>1 _____ 2 _____ 3 _____ 4 _____ 5<br>none            little            somewhat            quite a lot            a lot                                                    |
| 9  | A feeling of reassurance knowing people who have similar illnesses or difficulties has been gained<br>1 _____ 2 _____ 3 _____ 4 _____ 5<br>none            little            somewhat            quite a lot            a lot                           |
| 10 | A feeling that you cherish yourself have been<br>1 _____ 2 _____ 3 _____ 4 _____ 5<br>weakened            relatively weakened            neither            relatively strengthened            strengthened                                             |

| Compared with when you began suffering from (mental) illness, how do you think you have changed with respect to the following aspects? |                                                                                                                                                                                                                                                            |
|----------------------------------------------------------------------------------------------------------------------------------------|------------------------------------------------------------------------------------------------------------------------------------------------------------------------------------------------------------------------------------------------------------|
| 11                                                                                                                                     | A sense that you are capable of facing your life with illness has been gained<br>1_____2_____3_____4_____5<br>none                    little                    somewhat                    quite a lot                    a lot                           |
| 12                                                                                                                                     | A feeling that you got to focus on things you can do rather than things you cannot do has been gained<br>1_____2_____3_____4_____5<br>none                    little                    somewhat                    quite a lot                    a lot   |
| 13                                                                                                                                     | A sense that you would live by your own values rather than comparing yourself to others has been gained<br>1_____2_____3_____4_____5<br>none                    little                    somewhat                    quite a lot                    a lot |
| 14                                                                                                                                     | A feeling that you are happy to be alive has been<br>1_____2_____3_____4_____5<br>weakened            relatively weakened            neither            relatively strengthened            strengthened                                                    |
| 15                                                                                                                                     | Finding happiness in small things has become<br>1_____2_____3_____4_____5<br>difficult            relatively difficult            neither            relatively easy            easy                                                                       |
| 16                                                                                                                                     | New something to live for or enjoyment in life has been gained<br>1_____2_____3_____4_____5<br>none                    little                    somewhat                    quite a lot                    a lot                                          |
| 17                                                                                                                                     | A feeling that you are willing to begin something on your own has been<br>1_____2_____3_____4_____5<br>weakened            relatively weakened            neither            relatively strengthened            strengthened                               |
| 18                                                                                                                                     | Your mental strength has been<br>1_____2_____3_____4_____5<br>weakened            relatively weakened            neither            relatively strengthened            strengthened                                                                        |
| 19                                                                                                                                     | A sense that you have become capable of feeling your hope and future has been gained<br>1_____2_____3_____4_____5<br>none                    little                    somewhat                    quite a lot                    a lot                    |
| 20                                                                                                                                     | To work toward a healthy lifestyle that suits you has become<br>1_____2_____3_____4_____5<br>difficult            relatively difficult            neither            relatively easy            easy                                                       |
| 21                                                                                                                                     | A feeling that you want to be of help to others and society has been<br>1_____2_____3_____4_____5<br>weakened            relatively weakened            neither            relatively strengthened            strengthened                                 |

*Note:*

This English version is a simple translation from the original Japanese scale, without translation and back translation procedure.

We wrote “mental” in brackets in the introductory sentences and the sentence of #3.
